# Supplementary material for: Molecular Landscape of the Coagulome of Oral Squamous Cell Carcinoma
Source: MDPI journal article supplement (doi:10.3390/cancers14020460), 2022-01-17

## Article

# Molecular Landscape of the Coagulome of Oral Squamous Cell Carcinoma

Marine Lottin, Simon Soudet, Julie Fercot, Floriane Racine, Julien Demagny, Jérémie Bettoni, Denis Chatelain, Marie-Antoinette Sevestre, Youcef Mammeri, Michele Lamuraglia, Antoine Galmiche and Zuza-na Saidak

## Supplementary Materials

**Table S1.** Clinical characteristics of OSCC patients in TCGA ( $n = 320$ ).

|                           |                                                                                              |
|---------------------------|----------------------------------------------------------------------------------------------|
| <b>Median age (years)</b> | <b>61</b>                                                                                    |
| Sex                       | Female $n = 107$ ; Male $n = 213$                                                            |
| Primary site              | Alveolar ridge $n = 18$                                                                      |
|                           | Buccal mucosa $n = 23$                                                                       |
|                           | Floor of Mouth $n = 63$                                                                      |
|                           | Hard palate $n = 7$                                                                          |
|                           | Lip $n = 3$                                                                                  |
|                           | Oral cavity $n = 73$                                                                         |
|                           | Oral tongue $n = 133$                                                                        |
| pTNM                      | Stage I $n = 21$ ; Stage II $n = 54$ ; Stage III $n = 57$ ; Stage IV $n = 165$ ; NA $n = 23$ |
|                           | T T1 $n = 31$ ; T2 $n = 99$ ; T3 $n = 61$ ; T4 $n = 111$ ; TX $n = 9$ ; NA $n = 9$           |
|                           | N N0 $n = 122$ ; N1 $n = 48$ ; N2 $n = 103$ ; N3 $n = 3$ ; NX $n = 34$ ; NA $n = 10$         |
|                           | M M0 $n = 121$ ; MX $n = 34$ ; NA $n = 165$                                                  |
| Alcohol history           | NO $n = 107$ ; YES $n = 206$ ; NA $n = 7$                                                    |
| Smoking category          | Non-smoker $n = 89$ ; Current smoker $n = 97$ ; former smoker $n = 125$ ; NA $n = 9$         |
| ALI                       | NO $n = 168$ ; YES $n = 71$ ; NA $n = 81$                                                    |
| ECS                       | None $n = 173$ ; microscopic $n = 47$ ; gross $n = 20$ ; NA $n = 80$                         |
| PNI                       | NO $n = 114$ ; YES $n = 138$ ; NA $n = 68$                                                   |
| Surgical margin           | Negative $n = 234$ ; Close $n = 36$ ; positive $n = 37$ ; NA $n = 13$                        |

ALI: Angiolymphatic Invasion; ECS: Extracapsular Spread; PNI: Perineural invasion.

**Table S2.** Frequency of alterations/DNA seq in OSCC in TCGA ( $n = 315$ ).

|                 | # mutations (%) | # amplifications (%) | # deep deletions (%) |
|-----------------|-----------------|----------------------|----------------------|
| <i>F3</i>       | 2 (0.64)        | 1 (0.32)             | 0 (0)                |
| <i>PLAU</i>     | 3 (0.96)        | 3 (0.95)             | 0 (0)                |
| <i>PLAT</i>     | 4 (1.27)        | 7 (2.22)             | 3 (0.95)             |
| <i>PLAUR</i>    | 0 (0)           | 1 (0.32)             | 0 (0)                |
| <i>F2R</i>      | 2 (0.64)        | 0 (0)                | 1 (0.32)             |
| <i>SERPINE1</i> | 6 (1.91)        | 7 (2.22)             | 0 (0)                |

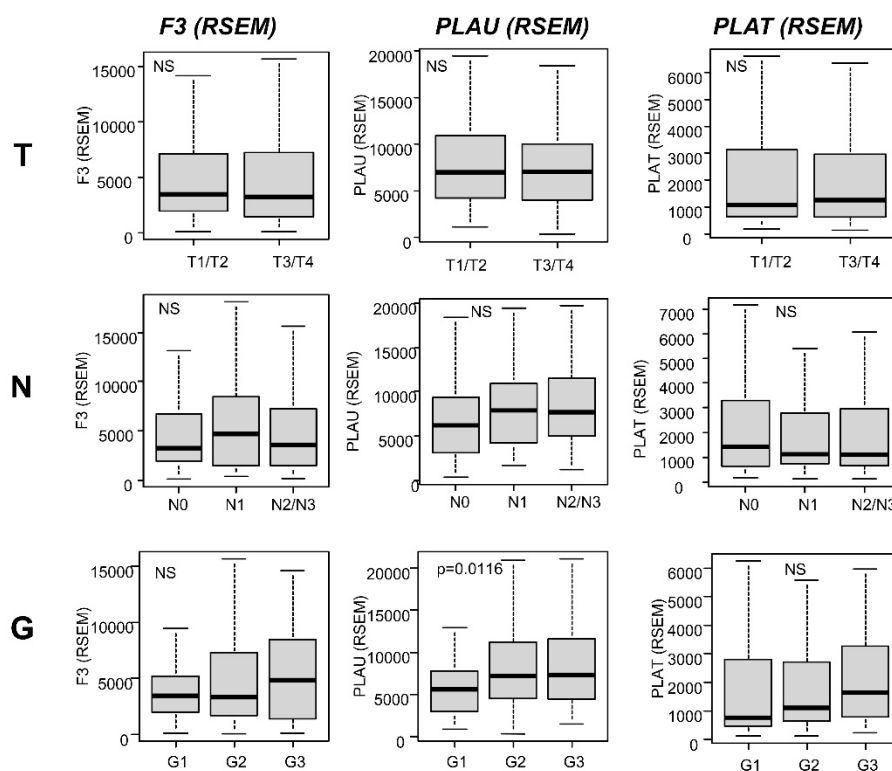

**Figure S1.** Expression of the coagulome and association with TNM/grade in OSCC. Clinical correlates of F3, PLAU and PLAT mRNA expression in OSCC ( $n = 315$  with genomic and clinical data). Tumors were analysed by size T (T1/2  $n = 128$  vs. T3/4  $n = 169$ ), by nodal involvement N (N0  $n = 120$  vs. N1  $n = 47$  vs. N2/3  $n = 103$ ) and by grade (G1  $n = 49$  vs. G2  $n = 196$  vs. G3  $n = 66$ ). Wilcoxon or Kruskal Wallis tests were used as appropriate.  $p < 0.05$  was set as the threshold for significance.

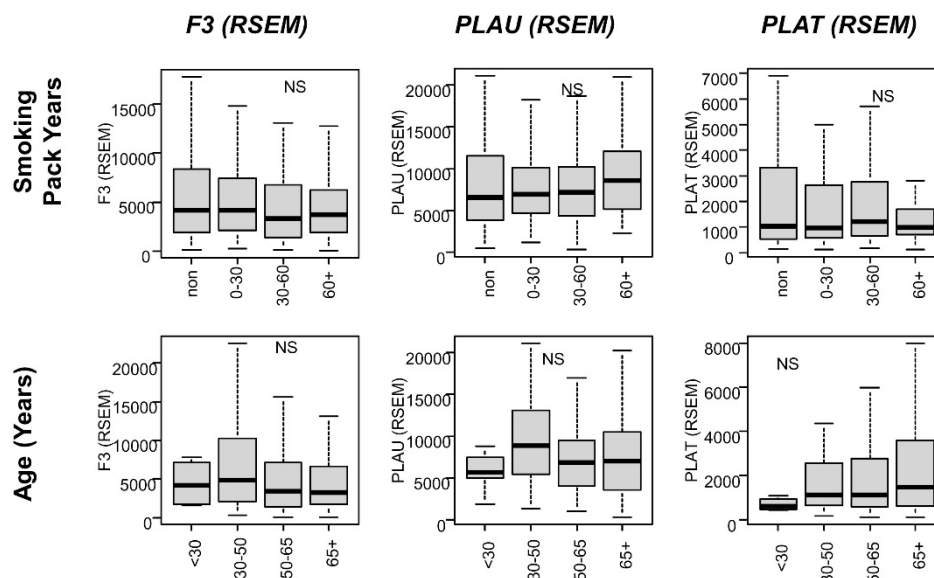

**Figure S2.** Expression of the coagulation and association with age and the smoking status in OSCC. Boxplots showing a lack of association between *F3*, *PLAUI* and *PLAT* mRNA expression (RSEM) and the smoking history (pack years, upper panel) and patient age (years, lower panel) in OSCC patients from TCGA. A Kruskal Wallis test was performed to evaluate the differences between conditions.  $p < 0.05$  was set as threshold for significance.

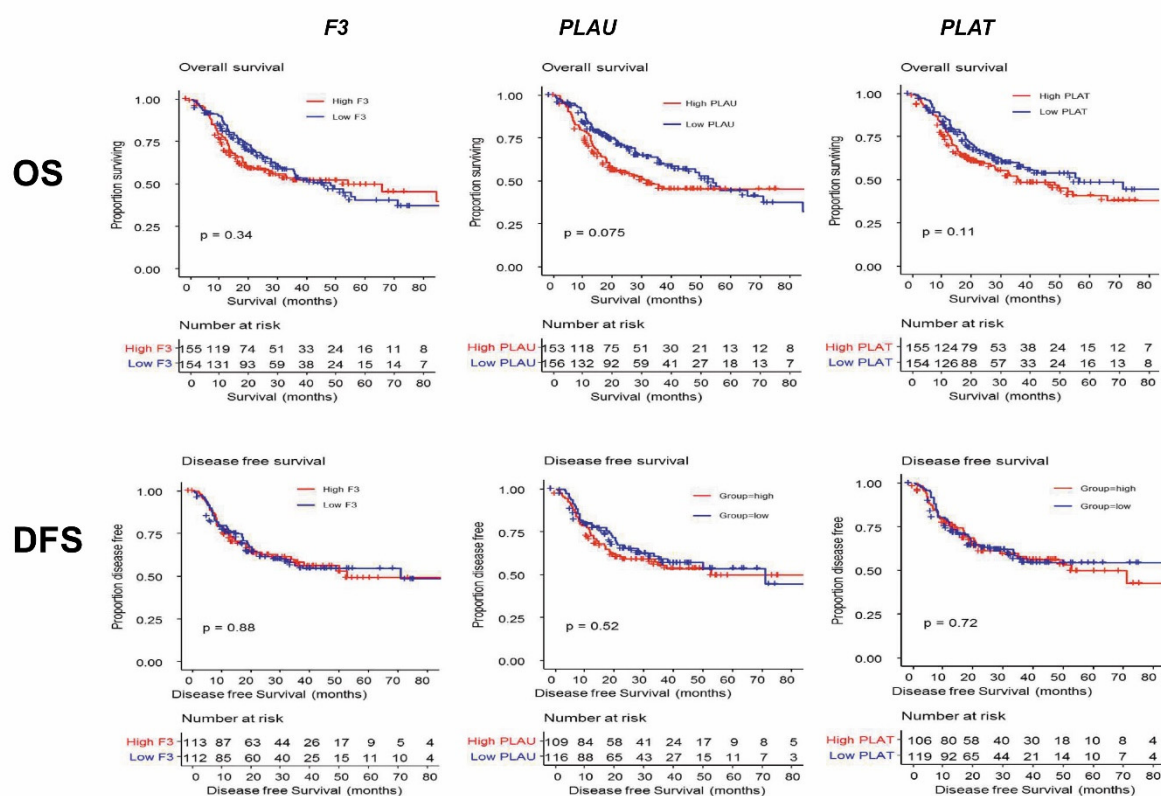

**Figure S3.** Link between *F3*, *PLAUI* and *PLAT* gene expression and OSCC patient survival. Kaplan-Meier analysis comparing the OS and DFS in OSCC patients from TCGA stratified in each case into two groups according to *F3*, *PLAUI* or *PLAT* by the median. High expressors are shown in red, low expressors in blue. A lack of association between *F3*, *PLAUI* and *PLAT* gene expression and OSCC patient survival was demonstrated using the log-rank test, setting  $p < 0.05$  as threshold for significance.

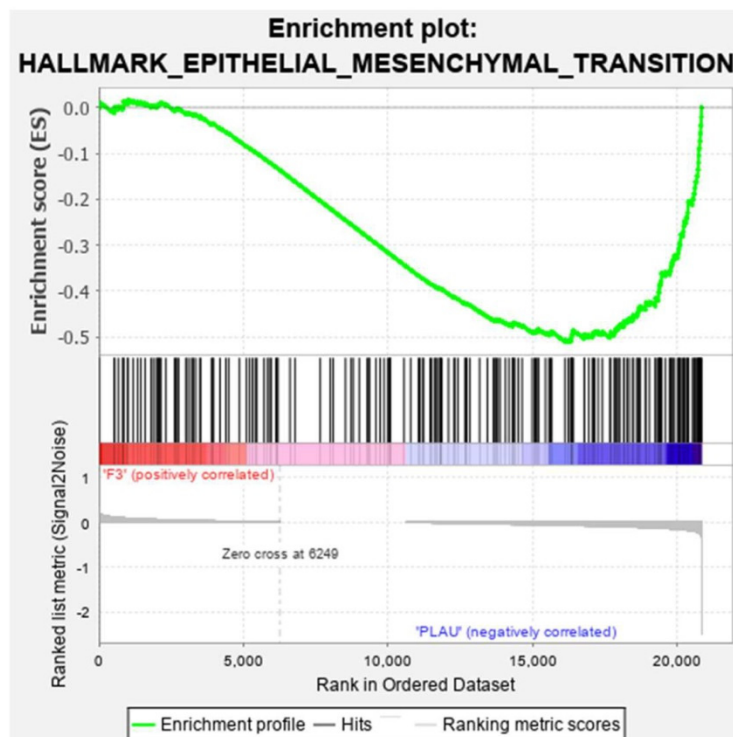

**Figure S4.** GSEA analysis of F3 expressing cancers cells vs. PLAU expressing cancer cells. GSEA analysis of a representative tumor from Puram et al. (GSE103322) comparing *F3* expressing cells ( $n = 246$ ) vs. *PLAU* expressing cells ( $n = 105$ ). GSEA analysis revealed the enrichment of the «Hallmark Epithelial Mesenchymal Transition» gene set (NES = 1.84,  $p = 0.0066$  (FDR)).

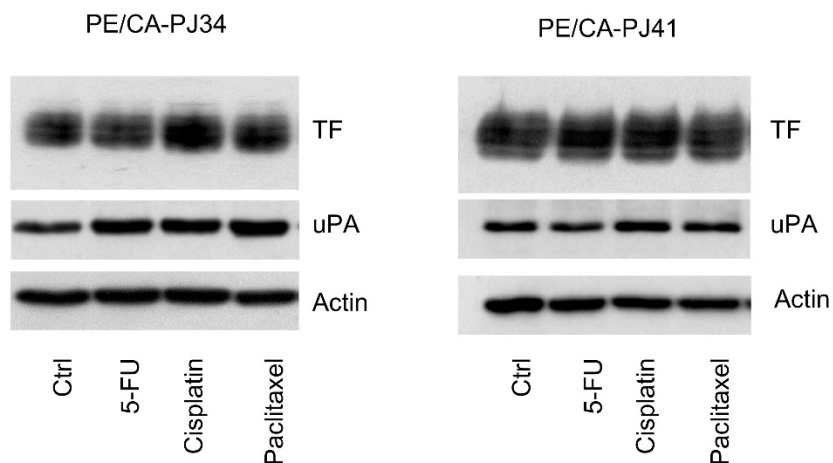

**Figure S5.** Immunoblot analysis of TF, uPA and PAI-1 in OSCC cells exposed to chemotherapeutic agents. The cell lines PE/CA-PJ34 and PE/CA-PJ41 were exposed to the chemotherapeutic agents 5-FU, cisplatin and paclitaxel applied for 48 h at a concentration of 10  $\mu$ M, 10  $\mu$ M and 0.1  $\mu$ M, respectively (corresponding to the IC<sub>50</sub> for each drug). Actin is given as control.

Original Western Blots

Figure 10A

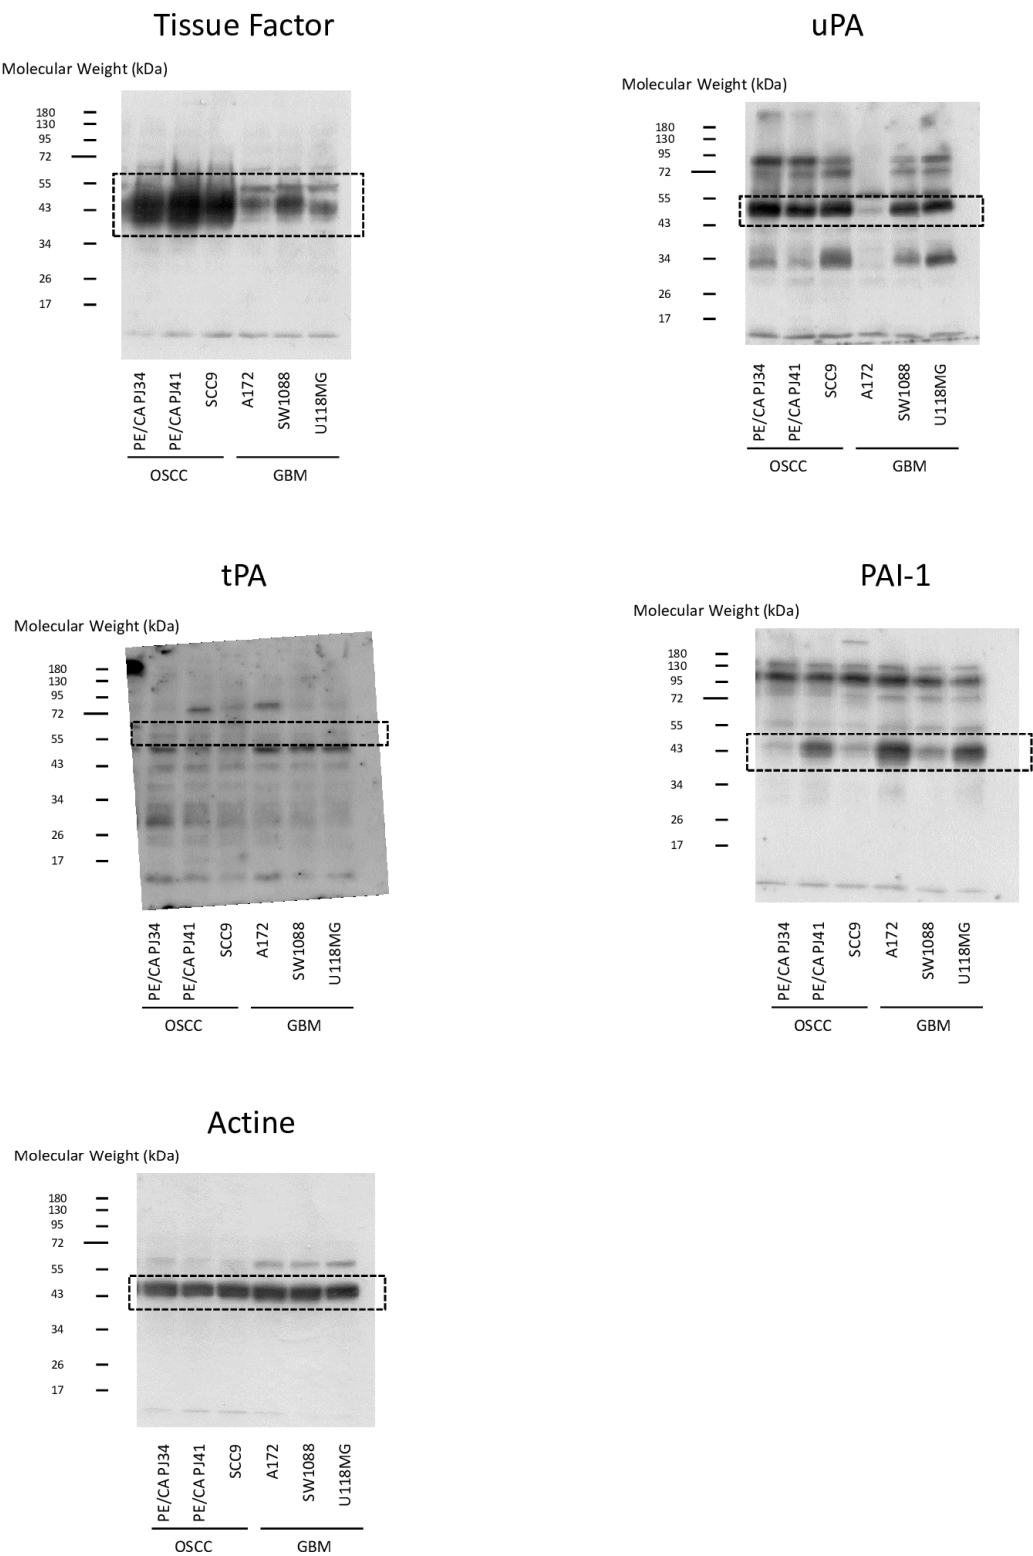

Figure 10C

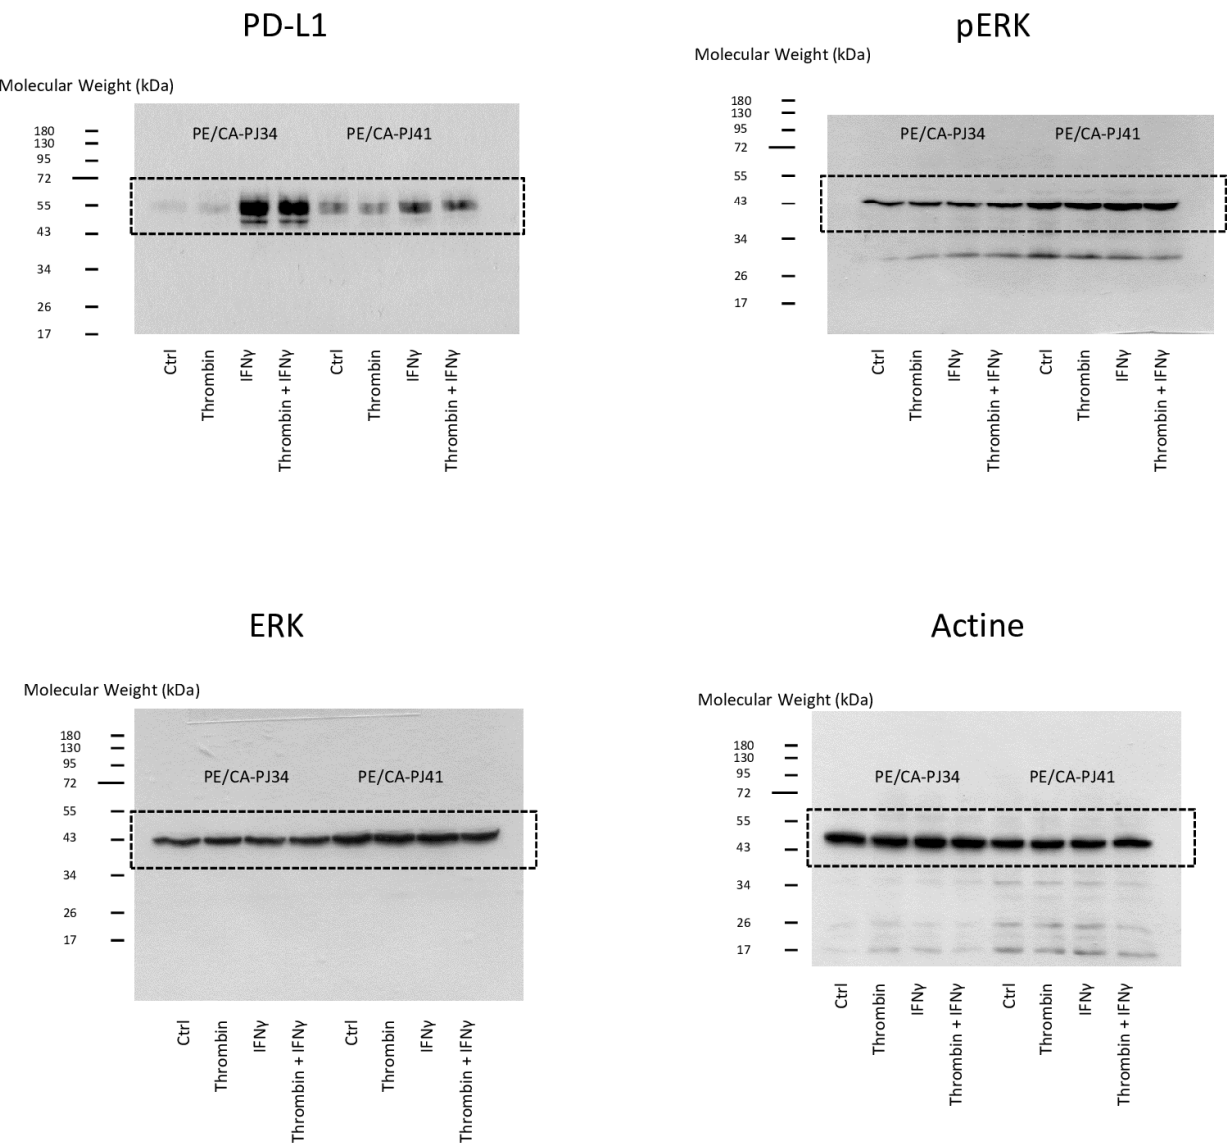

Suppl. Figure 5

PE/CA PJ34

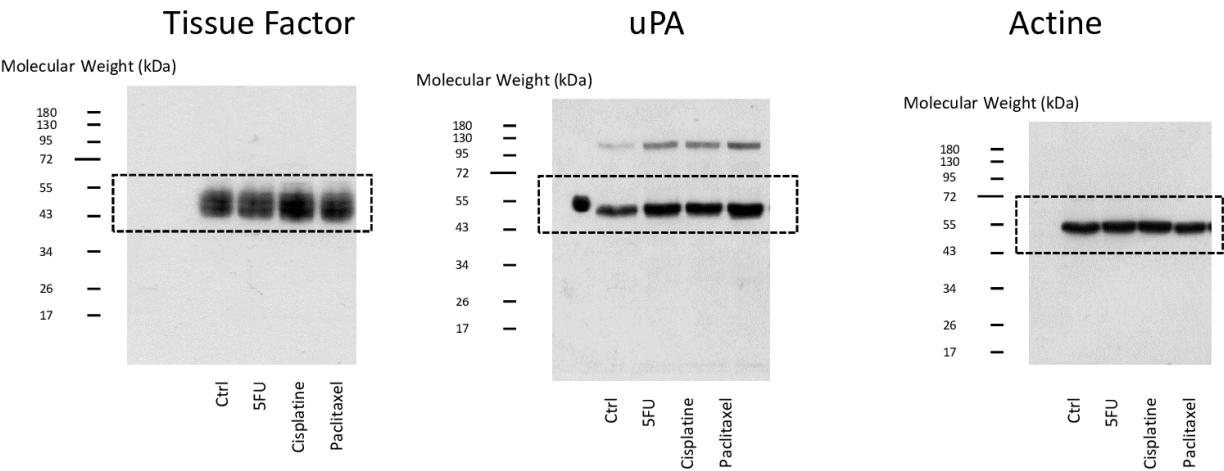

PE/CA PJ41

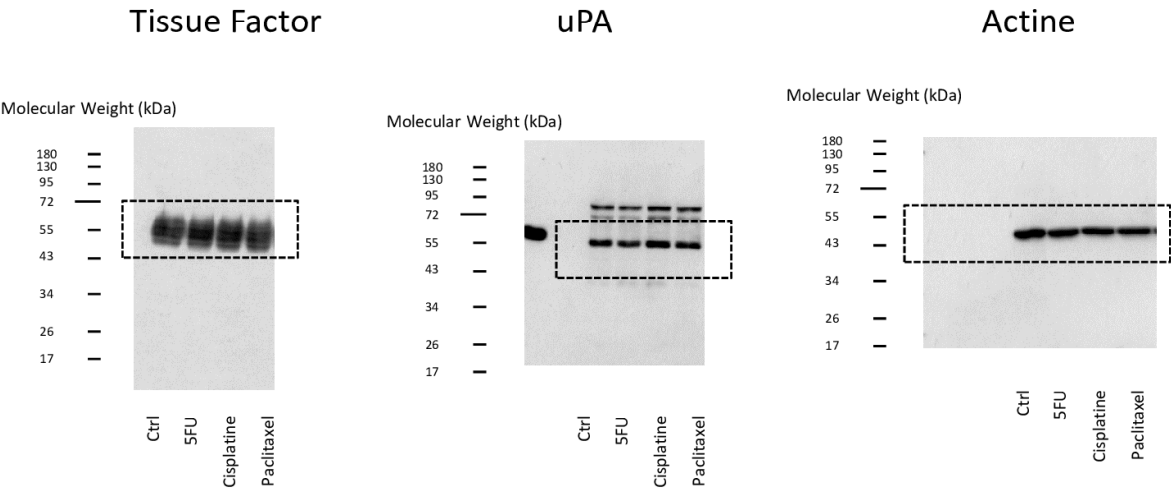

Supplement: s1 [file s1]
